# Supplementary material
Source: PubMed Central journal article supplement (PMC4630776)
Supplement: cb500462t_si_001.pdf [file cb500462t_si_001.pdf]

## **One-Step Enzymatic Modification of the Cell Surface Redirects Cellular Cytotoxicity and Parasite Tropism**

Lee Kim Swee, Sebastian Lourido, George W. Bell, Jessica R. Ingram and Hidde L. Ploegh

Whitehead Institute for Biomedical Research  
9 Cambridge Center  
02142 Cambridge, Massachusetts, USA

Correspondence:

Hidde L. Ploegh  
[ploegh@wi.mit.edu](mailto:ploegh@wi.mit.edu)  
Tel: 617.324.2031  
Fax: 617.452.3566

## Supporting Information

### Supplementary Table 1. Putative modified proteins.

List of type I proteins from yeast, *Toxoplasma*, human and mouse proteome that display an N-terminal glycine residue after potential enzymatic removal of a signal peptide or initiating methionine residue.

### Supplementary Movie 1. Fibroblast invasion by sortagged *Toxoplasma gondii*.

*Toxoplasma gondii* tachyzoites were incubated with 500  $\mu$ M TAMRA-LPETG and 20  $\mu$ M sortase A for 15 minutes. Parasites were then washed and incubated with human foreskin fibroblasts. Scale bar: 10 micrometer.

## Supporting Information Methods

Analysis of potential sortagged proteins

Canonical isoforms of single-pass type I membrane proteins were downloaded from UniProt (using ID "SL-9905") for human (n=1405), mouse (n=1151), and *S. cerevisiae* (n=50), including locations of predicted signal peptides (from 'signalp' (<http://www.ncbi.nlm.nih.gov/pubmed/21959131>)). For *Toxoplasma gondii*, all proteins were downloaded from ToxoDB for strain GT1, and single-pass type I membrane proteins (n=901) were identified using 'tmhmm' (<http://www.ncbi.nlm.nih.gov/pubmed/11152613>), followed by signal peptide prediction with 'signalp'. For all four species, we identified proteins containing glycine directly following the signal peptide (if present) or the initiating methionine.
